1 **Quality of life and its associated factors among epileptic patients on treatment follow**  
2 **up in North Shoa administration, Amhara National State, Ethiopia**

3 **Esubalew Guday<sup>1\*</sup>, Getabalew Engdaye<sup>2</sup>, Belachew Tekleyohannes<sup>3</sup>, Nigus Alemnew<sup>4</sup>,**  
4 **Akne Eshete<sup>5</sup>, Yihenew Sewale<sup>6</sup>**

5 <sup>1</sup>Department of Nursing, College of Health Science, Debre Birhan Health Science College, Debre  
6 Birhan, Ethiopia

7 <sup>2</sup>Department of Medical laboratory, College of Health Science, Debre Birhan Health Science  
8 College, Debre Birhan, Ethiopia

9 <sup>3</sup>Department of Environmental Health Science, College of Health Science, Debre Birhan Health  
10 Science College, Debre Birhan, Ethiopia

11 <sup>4</sup>Department of Psychiatry, College of Health Science, Debre Birhan University, Debre Birhan,  
12 Ethiopia

13 <sup>5</sup>Department of Nursing, College of Health Science, Debre Birhan University, Debre Birhan,  
14 Ethiopia

15 <sup>6</sup>Department of Nursing, College of Health Science, Debre Birhan University, Debre Birhan,  
16 Ethiopia

17 **Email:** Esubalew Guday ([gudayesuye@gmail.com](mailto:gudayesuye@gmail.com)), Getabalew Engdaye  
18 ([getabaleweng@gmail.com](mailto:getabaleweng@gmail.com)), Belachew Tekleyohannes ([belachewtekleyohannes@gmail.com](mailto:belachewtekleyohannes@gmail.com)),  
19 Nigus Alemnew([nigusalemnew2014@gmail.com](mailto:nigusalemnew2014@gmail.com)), Akine Eshete([Akine.eshete@yahoo.com](mailto:Akine.eshete@yahoo.com)),  
20 Yihenew Sewale([Yihenewsewale123@gmail.com](mailto:Yihenewsewale123@gmail.com))

21 **Abstract**

22 **Background:** Epilepsy is a common condition worldwide and has been observed to affect quality  
23 of life. Epilepsy patients have a lower quality of life than the general population as well as many  
24 other chronic disease patients. However, aside from focusing on symptom reduction, no attention  
25 is paid to the quality of life of those with epilepsy. This study aims to evaluate quality of life and  
26 associated characteristics among epilepsy patients who visited North Shoa zone hospitals in  
27 Ethiopia.

28 **Methods:** An institution-based cross-sectional study design was conducted from April -May 2021  
29 at North Shoa zone hospitals. A systematic random sampling technique was used to get a total

30 number of 472 samples. Data on quality of life was assessed through interviews using the World  
31 Health Organization Quality of Life—Brief (WHOQOLBREF) Version. The collected data were  
32 coded, entered into Epi Data 3.1, and analyzed by using SPSS version 25. Simple and multiple  
33 linear regression analysis models were fitted and the unstandardized  $\beta$  coefficient at 95%  
34 confidence interval was employed. The statistical significance was accepted at  $p$ -value  $<0.05$ .

35 **Results:** From a total of 472 participants the response rate was 98%. The mean score of quality of  
36 life was  $57.2 \pm 12.3$ . Age ( $\beta=5$ , 95% CI: 2.301, 7.699), marital status ( $\beta=-6.914$ , 95%CI: -8.867, -  
37 4.961), seizure frequency ( $\beta=-.2.307$ , 95%CI: -4.795, .020), Anti-epileptic drug non-adherence  
38 ( $\beta=-.11.016$ , 95%CI: -13.642, -8.389), anxiety ( $\beta-4.062$ , 95%CI: (-6.503, -1.621), poor social  
39 support ( $\beta=-6.220$ , 95%CI: (-8.422, -4.017) and moderate social support ( $\beta=-5.58$ , 95%CI: -7.792,  
40 -3.368) were significantly associated with quality of life.

41 **Conclusion:** The mean quality of life of people living with epilepsy in this study was low. Age,  
42 marital status, seizure frequency, concomitant anxiety, antiepileptic drug non-adherence, number  
43 of anti-epileptic drugs/day, moderate and poor social support were all found to be predictors of  
44 quality of life in this study. As a suggestion, the patient treatment plan should include a quality of  
45 life assessment that addresses psychosocial concerns; professional counseling on how to cope with  
46 psychological, environmental, and social difficulties should be increased.

47 **Keywords:** Epilepsy, Quality of life, WHOQOL-BREF

## 48 1. Introduction

49 Quality of life can be defined as “individuals' perceptions of their position in life in the context of  
50 the culture and value systems in which they live and, in relation to their goals, expectations,  
51 standards and concerns (1). It is a broad term that incorporates the physical health, psychological  
52 condition, degree of freedom, social relationships, personal values and their relationships to  
53 important environmental characteristics in a complex manner (2). An ideal health assessment,  
54 therefore, would include a measure of the person's physical health, a measure of physical, social  
55 and psychological functioning, and a measure of quality of life. To devise a measure of quality of  
56 life that is both reliable and valid, a broad range of potentially independent domains covering all  
57 important aspects of quality of life is necessary (3).

58 International League against Epilepsy (ILAE) defines epilepsy as a disease of the brain defined by  
59 any of the following conditions: (i) At least two unprovoked (or reflex) seizures occurring  $> 24$

60 hrs. Apart; (ii) one unprovoked (or reflex) seizure and a probability of further seizures similar to  
61 the general recurrence risk (at least 60%) after two unprovoked seizures, occurring over the next  
62 10 years; or (iii) diagnosis of an epilepsy syndrome (4).

63 The disease has significant effects on social, cognitive, psychological, and physical components  
64 of life as well as quality of life of the patients. The effect of epilepsy on quality of life is triggered  
65 by several factors including the use of antiepileptic medications frequency of seizure duration on  
66 anti-epileptic drugs (AED) (5). Epilepsy is a devastating disorder that affects patients' quality of  
67 life, regardless of use of antiepileptic drugs (AEDs) (6).

68 Epilepsy is the most common neurological disease that affects around 50 million people of all ages  
69 globally. All over the world, epileptic patients are the focus of human rights violations and  
70 discrimination. The stigma of epilepsy can discourage people from seeking health care and has a  
71 negative impact on quality of life and social enclosure (7).

72 Epilepsy accounts for over 13 million disability-adjusted life years (DALYs) and is accountable  
73 for more than 0.5% of the global burden of disease (GBD) (7). Psychiatric and Physical  
74 comorbidities in people with epilepsy are linked with increased health care needs, poorer health  
75 outcomes, greater social exclusion and decreased quality of life. Anxiety (20%) and depression  
76 (23%), respectively, are the most common mental comorbidities (8).

77 The impact of epilepsy on quality of life can be significant with extensive and life-long  
78 consequences; the key areas where quality of life is influenced by epilepsy include Education,  
79 Employment, independence and social isolation (8).

80 The study at Gonder university hospital revealed that marital status did not significantly affects  
81 quality of life (9) but other studies revealed that marital status significantly affects quality of life  
82 (10-13).

83 According to many researches on epileptic patients' quality of life, clinical and personal traits are  
84 proximal or direct determinants, whereas socio demographic factors are distant factors that  
85 influence epileptic patients' quality of life (9-11, 13, 14).

86 Therefore, the aim of this study was to assess quality of life and associated factors among patients  
87 with epilepsy, and the results of this study will add an input to policy makers to scale up a public  
88 health program for designing and implementing strategies to improve quality of life.

---

## 89 **2. Methods and Materials**

### 90 **2.1 Study area and period**

91 The study was conducted at North shoa zone hospitals, Amhara regional state from April  
92 01/4/2021-May 30/05/2021. North shoa zone is one of 11 Zones in the Ethiopian Amhara Region.  
93 The Zone is bordered on the south and the west by the Oromia Region, on the north by South  
94 Wollo, on the northeast by the Oromia Zone, and on the east by the Afar Region. Based on the  
95 2018 demographic and health data, the zone has a total population of 1,692,555(15). The zone has  
96 10 public, two private hospitals, 99 health centers, 391 health post,and 164 private clinics which  
97 provide different health services for the urban community and, people coming from different  
98 neighboring regions.

### 99 **2.2 Study design**

100 Institutional based cross-sectional study design was employed.

### 101 **2.3 Populations**

#### 102 **2.3.1 Source population**

103 All epileptic patients on-treatment follow up at hospitals of north shoa zone.

#### 104 **2.3.2 Study population**

105 All epileptic patients attending at the selected hospitals of north shoa zone during the study  
106 period.

#### 107 **2.3.3 Study unit**

108 Each individuals who participate in the study at the selected hospitals.

### 109 **2.4 Inclusion and Exclusion criteria**

#### 110 **2.4.1 Inclusion criteria**

111 Patients with epilepsy age 18 years and above who are on antiepileptic medication at least for six  
112 months were included in the study.

#### 113 **2.4.2 Exclusion criteria:**

114 Patients who are mentally unstable and critically ill patients were excluded.

### 115 **2.5 Sample Size Calculation**

116 Sample size is determined using a single population mean formula with the assumptions of  
117  $61 \pm 11.6$  mean and standard deviation of the overall quality of life of a study conducted in Ethiopia  
118 (16)

---

119 
$$n = \frac{[(Z\alpha/2)^2 \times \sigma^2] \times \text{design effect (1.3)}}{d^2}$$

121 Since the source population was < 10, 000, correction formula was used and by considering 10%  
122 non-response rate, the final calculated sample size was **472**.

### 123 **2.6 Sampling technique**

124 12 hospitals in North Shoa zone were stratified based on the service they provide (comprehensive  
125 specialized, general, and primary hospitals). Simple random selection was applied for the strata  
126 that contain more than one hospital based on 30% coverage to secure representativeness. The  
127 required sample size was taken proportionally to the size of the selected hospitals. To get the  
128 individual sample units (participants) at the selected hospitals systematic random sampling was  
129 conducted by using the total number of epileptic individuals who have an appointment during the  
130 study period and number of samples required in each selected hospital.

131 After getting the sampling fraction in the selected hospital a simple random method/lottery method  
132 was used among the first “k” units to get the first participant.

### 133 **2.7 Data collection methods**

134 Data was collected using data abstraction format and the standardized WHOQOL-BRIEF  
135 questionnaire(1). Data regarding drug adherence, perceived stigma, self-esteem, social support,  
136 sleep quality and substance use was collected by using questionnaire adopted from different tools.

### 137 **2.8 Data collection instruments**

138 WHOQOL-BREF contains 26 items and a sound, cross-culturally valid assessment of QOL,  
139 consisting of four domains (6): physical health (7 items), psychological health (6 items), social  
140 relationships (3 items), and environmental health (8 items); it also contains the first two questions  
141 on the general perception of life and health and Each individual item of the WHOQOL-BREF were  
142 scored from 1(very dissatisfied/very poor) to 5 (very satisfied/very good).

143 Drug adherence: was measured by 10 items medication adherence rating scale; MARS (17).

144 HADS was a 14-item questionnaire, commonly used to screen for symptoms of anxiety and  
145 depression. The 14-items can be separated into two 7-item subscales for anxiety and depression  
146 (18).

147 Self-esteem: was measured by 10 items of Rosenberg self-esteem scale (19)

148 Perceived stigma: was measured by revised version of the Epilepsy Stigma Scale (rESS) with 3  
149 items questionnaire on a three-point rating scale (0 = not at all, 1 = yes, maybe, 2 = yes,  
150 probably, 3 = yes, definitely) (20)

151 Social support: was measured by 14 items of Oslo social support scale (OSSS-3) (21).

152 Sleep quality: was measured by Pittsburgh sleep quality index 19 items of questionnaire (22).

## 153 **2.9 Dependent and Independent variables**

### 154 **2.9.1 Dependent Variables**

155 ➤ Quality of Life of epileptic patients.

### 156 **2.9.2 Independent Variables**

157 ➤ **Socio-demographic factors:** Sex, Age, Religion. Educational status, marital status,  
158 Occupation, residence.

159 ➤ **Clinical Factors:** seizure type, seizure frequency, number of AED /day, Duration of  
160 epilepsy in yrs., history of comorbid disease, family history of epilepsy, duration on-  
161 treatment ,current status of epilepsy,

162 ➤ **Psychosocial factors:** Perceived self-esteem, perceived stigma, Compliance to self-  
163 care, social support, enough and regular sleep, Recreational activity, Regular physical  
164 activity, Ever substance use, Current substance use.

## 165 **2.10 Operational and term definition**

166 • **Quality of life:**-the physical, psychological, social and environmental well-being of  
167 patients with epilepsy.

168 • Based on HAD scale classified anxiety & depression if the total score is (18):-

169 ✓ **0-7 = Normal:** - patients who have no sign of depression and anxiety.

170 ✓ **8-10 = Borderline abnormal (borderline case):**- patients who have at borderline  
171 or have risk developing depression and anxiety.

172 ✓ **11-21= Abnormal (case):**- patients who had sign or case of depression and anxiety.

---

- 173 • **Drug adherence:** based on medication adherence rating scale Patients who scored below  
174 7 were considered as no adherent to their antiepileptic medications (17).
- 175 • **Perceived self-esteem:-** based on Rosenberg self-esteem scale Higher scores indicates higher  
176 self-esteem (19).
- 177 • **Perceived stigma:** based on revised version of the Epilepsy Stigma Scale 0 represents no  
178 stigma, a score of 1–6 represents mild to moderate stigma, and a score of 7–9 represents  
179 high stigma.
- 180 • **Social support:** based on Oslo social support scale individuals with total score 3-8 poor  
181 social support, 9-11 moderate social support, and 12-14 strong social support (21)
- 182 • **Sleep quality: Poor sleep quality:** explained by a cut-off point of greater than or equal to  
183 5 by using PSQI (23).
- 184 • **Good sleep quality:** explained by a cut-off point of less than to 5 by using PSQI (23).
- 185 • **Regular physical activity:** Considered if a person practiced any activity including walking  
186 for more than 30 minutes a day.
- 187 • **Current substance use:** use of drugs or alcohol, cigarettes, illegal drugs, prescription  
188 drugs, inhalants at the moment.

## 189 **2.11 Data quality assurance and control**

190 The questionnaire and consent documents was first developed in English language, then translate  
191 into Amharic, local language, for data collection and finally retranslated back into English by  
192 another translator to check consistency. Face validity of the questionnaire was assessed and  
193 meanings of all items was checked before the actual data collection accordingly.

194 Items interpretability and understandability by the study participants were evaluated by pre-testing  
195 the questionnaire on epileptic patients (5% of the total sample size) having follow up at Arerti  
196 hospital and necessary correction was taken accordingly. Six data collectors who has psychiatric  
197 in nursing were training on overall project plan, using a rapport approach and on how to  
198 communicate with epileptic patients to elicit reliable data.

199 Supervision was also done on the spot by principal investigator and one supervisor. The collected  
200 data was checked for its completeness and clarity by the principal investigator and supervisor daily.  
201 Data clean up and cross-checking was done before analysis.

## 202      **2.12 Data entry and analysis**

203      After checking for its completeness, data was checked, cleaned, and entered into Epi data version  
204      3.1 and transferred to SPSS version 25 for analysis. Descriptive statistics were expressed in  
205      frequency, percentage, mean and standardization to summarize socio demographic, clinical and  
206      personal characteristics and evaluate distribution of responses.

207      Linear regression model was used to assess the association between the dependent and different  
208      explanatory variables. Variables with p-value <0.2 were further analyzed by multiple linear  
209      regression and value < 0.05 take as level of significance.

210      The psychometric property WHO QOL-BREEF questionnaire was tested for its reliability by  
211      author's Cranach's alpha test value of >0.7 as accepted internal consistency.

## 212      **2.13 Ethical consideration**

213      The respondents' rights and dignity was respected. Written consent was obtained from the study  
214      participant (for the minors especially for those <18yrs consent was obtained from their parents) to  
215      confirm willingness for participation after explaining the objective of the study. The respondents  
216      were notified that they have the right to refuse or terminate at any time of the interview. The  
217      information provided by each respondent was kept confidential throughout the research process.

## 218      **3. Results**

### 219      **3.1 Socio-demographic characteristics**

220      A total of 462 participants took part with a response rate of 98%. The mean age of the participants  
221      was 33.31 ( $\pm$ SD=13.7) years. Among the participants 297(64.3%) were males and 165(35.7) were  
222      females. Majority of the participants, 145(31.4%) were within the age group of 25-34yrs (**See**  
223      **table below**).

224      ***Table 1** Socio demographic characteristics of epileptic patients on treatment follow up in North*  
225      *Shoa Administration, Amhara national state, Ethiopia, 2021 (N=462)*

| <b>Variables</b> | <b>Categories</b> | <b>Frequency</b> | <b>Percentage</b> |
|------------------|-------------------|------------------|-------------------|
| Sex              | Male              | 297              | 64.3              |
|                  | Female            | 165              | 35.7              |
|                  | 18-24yrs          | 138              | 29.9              |
|                  | 25-34yrs          | 145              | 31.4              |



|                     |                       |     |      |
|---------------------|-----------------------|-----|------|
| Age                 | 35-44yrs              | 90  | 19.5 |
|                     | >44yrs                | 89  | 19.3 |
| Marital status      | Single                | 194 | 42.0 |
|                     | Married               | 242 | 52.4 |
|                     | Divorced              | 26  | 5.6  |
| Religion            | Orthodox              | 389 | 84.2 |
|                     | Muslim                | 58  | 12.6 |
|                     | Protestant            | 14  | 3.0  |
|                     | Catholic              | 1   | .2   |
| Educational status  | Cannot read and write | 106 | 22.9 |
|                     | Primary school        | 170 | 36.8 |
|                     | Secondary school      | 62  | 13.4 |
|                     | Diploma               | 83  | 18.0 |
|                     | First degree          | 41  | 8.9  |
| Occupational status | Unemployed            | 33  | 7.1  |
|                     | Farmer                | 106 | 22.9 |
|                     | Housewife             | 34  | 7.4  |
|                     | Student               | 76  | 16.5 |
|                     | Employed              | 84  | 18.2 |
|                     | self-employed         | 129 | 27.9 |
| Income level        | <1000                 | 214 | 46.3 |
|                     | 1001-2500             | 80  | 17.3 |
|                     | 2501-4000             | 80  | 17.3 |
|                     | >4000                 | 88  | 19.0 |

226

### 227 **3.2 Clinical characteristics**

228 The mean age for the onset of epilepsy was 22.68 ( $\pm$ SD=12.8) years. Regarding the duration of  
 229 the illness, 187 (40.5%) had 11 and above years. The majority of the participants, 377(81.6%)  
 230 were under mono therapy, and 220 (47.6%) had one or more seizure attack during last follow up.  
 231 The mean of AED adherence was 7.2 $\pm$ 0.82. (**See table below**).

232 **Table 2:** *Clinical characteristics of epileptic patients on treatment follow up in North Shoa*  
 233 *admiration, Amhara national state, Ethiopia, 2021 (N=462)*

| <b>Variables</b>                        | <b>Categories</b>                | <b>Frequency</b> | <b>Percentage</b> |
|-----------------------------------------|----------------------------------|------------------|-------------------|
| Age at diagnosis                        | <=15yrs                          | 143              | 31.0              |
|                                         | 16-30yrs                         | 222              | 48.1              |
|                                         | 31-45yrs                         | 61               | 13.2              |
|                                         | >45yrs                           | 36               | 7.8               |
| Type of epilepsy                        | generalized onset                | 397              | 85.9              |
|                                         | focal onset                      | 65               | 14.1              |
| Seizure frequency during last follow up | no seizure                       | 159              | 34.4              |
|                                         | 1-2 seizure                      | 220              | 47.6              |
|                                         | 3 or more seizure                | 83               | 18.0              |
| Number of AED/day                       | Mono therapy                     | 387              | 83.8              |
|                                         | Poly therapy                     | 75               | 16.2              |
| Epilepsy duration                       | <=5yrs                           | 128              | 27.7              |
|                                         | 5-10yrs                          | 147              | 31.8              |
|                                         | >=11yrs                          | 187              | 40.5              |
| Treatment duration                      | 1-5yrs                           | 190              | 41.1              |
|                                         | 6-10                             | 148              | 32.0              |
|                                         | >10                              | 124              | 26.8              |
| Current drug(s)                         | Phenobarbitone                   | 288              | 62.3              |
|                                         | Carbamazepine                    | 71               | 15.4              |
|                                         | Phenobarbitone and valproate     | 20               | 4.3               |
|                                         | Phenobarbitone and carbamazepine | 42               | 9.1               |
|                                         | Valproate                        | 28               | 6.1               |
|                                         | Phenytoin                        | 9                | 1.9               |
|                                         | Others*                          | 4                | .9                |
| Drug adherence                          | Adherent                         | 408              | 88.3              |
|                                         | Non adherent                     | 54               | 11.7              |

|                                               |              |     |      |
|-----------------------------------------------|--------------|-----|------|
| Comorbidity of anxiety                        | Yes          | 67  | 14.5 |
|                                               | No           | 395 | 85.5 |
| Comorbidity of depression                     | Yes          | 59  | 12.8 |
|                                               | No           | 402 | 87.0 |
| Other comorbid diagnosed disease <sup>a</sup> | Yes          | 74  | 16.0 |
|                                               | No           | 388 | 84.0 |
| Current status of epilepsy                    | No change    | 36  | 7.8  |
|                                               | Improved     | 404 | 87.4 |
|                                               | Deteriorated | 22  | 4.8  |

234 **Notes:** <sup>a</sup> =Diabetes mellitus, HIV/AIDS, hypertension

235 \* = clonazepam, lamotrigine

### 236 3.3 Psychosocial factors

237 Regarding personal and social characteristics of the participants, 236(51.1%) had perceived  
 238 stigma; 212(45.9%) had poor social support. About 377(81.6%) had good Sleep quality and 49  
 239 (10.6%) of the participants were ever used substances for a non-medical purpose and the mean  
 240 score of self-esteem of the participants were 20.1±3.7 (**See table below**).

241 **Table 3:** *Personal (individual and social) characteristics of epileptic patients on treatment follow*  
 242 *up in North Shoa administration, Amhara national state, Ethiopia, 2021 (N=462)*

| <i>Variables</i> | <i>Categories</i>  | <i>Frequency</i> | <i>Percentage</i> |
|------------------|--------------------|------------------|-------------------|
| Perceived stigma | had no stigma      | 236              | 51.1              |
|                  | had stigma         | 226              | 48.9              |
| Social support   | Poor               | 212              | 45.9              |
|                  | Moderate           | 142              | 30.7              |
|                  | Strong             | 108              | 23.4              |
| Self esteem      |                    | Mean =20.1±3.7   |                   |
| Sleep quality    | good sleep quality | 377              | 81.6              |
|                  | poor sleep quality | 83               | 18.0              |
| Substance use    | no substance use   | 413              | 89.4              |
|                  | substance user     | 49               | 10.6              |

243 **3.4 Mean Quality of Life Score of Participants**

244 The overall mean (SD) score of quality of life among epilepsy patients was 57.2±12.3. Among  
 245 four domains of WHO QOL-BREF, participants scored highest in the physical domain  
 246 (62.43±6.5), while the lowest mean (SD) score was for environment domain (49.59 ±7.03)( See  
 247 **table below**)

248 **Table 4:** Mean scores of Quality of Life scale of epileptic patients on treatment follow up in North  
 249 *Shoa administration, Amhara national state, Ethiopia, 2021 (N=462)*

| Variables                              | Likert scale Mean<br>± SD | Formula for domain<br>mean* | Domain mean ± SD of 100 |
|----------------------------------------|---------------------------|-----------------------------|-------------------------|
| Physical domain (7 items)              | 3.5±0.93                  | 100/(35-7) x (24.48-7)      | 62.43±6.5               |
| Psychological domain(6 items)          | 3.6±0.9                   | 100/(30-6) x (20.17-6)      | 59.04±5.6               |
| Social domain (3 items)                | 3.29±0.78                 | 100/(15-3) x (9.88-3)       | 57,3±2.34               |
| Environmental (8 items)                | 2.98±0.88                 | 100/(5-1) x (3.56-1)        | 49.59±7.03              |
| How would you rate your QOL            | 3.56±0.727                | 100/(5-1) x (3.56-1)        | 64±0.727                |
| How satisfied are you with your health | 3.49±0.784                | 100/(5-1) x (3.49-1)        | 62.25±0.784             |
| Overall HRQOL                          | 3.29±0.8                  | 100/(130-26) x (85.45-26)   | 57.2±12.31              |

\*Domain mean transformed to 100 = 100/ (maximum score – no of items) x (sum of means – no of items)

250 **3.5 Factors Associated with Quality of Life**

251 A simple linear regression was performed in connection to a variety of variables that could  
 252 potentially influence quality of life. Variables with *p*-value <0.20 during simple linear regression  
 253 analysis were selected for further analysis in multiple linear regression analysis.

254 **3.5.1 Associated factors simple linear regression analysis result**

255 Age, marital status, seizure frequency, number of antiepileptic drug, epilepsy duration, duration  
 256 on treatment, anxiety and depression, current status of epilepsy, drug adherence, self-esteem,  
 257 perceived social stigma, social support, comorbidity of other medical illness and sleep quality were  
 258 factors associated with quality of life in simple linear regression analysis (**See table below**).

259 **Table 5: Simple linear regression analysis of factors associated quality of life of epileptic patients**  
 260 *on treatment follow up in North Shoa administration, Amhara national state, Ethiopia, 2021*

| <b>Variables</b>                        | <b>Categories</b> | <b>Crude <math>\beta</math>(95%CI)</b> | <b>P-value</b> |
|-----------------------------------------|-------------------|----------------------------------------|----------------|
| Age                                     | 18-24 years       | 3.149 (-.126, 6.424)                   | .059           |
|                                         | 25-34 years       | 4.376 (1.132, 7.619)*                  | .008           |
|                                         | 35-44 years       | 3.395 (-.206, 6.996)                   | .065           |
|                                         | >44 years         | Ref                                    | Ref            |
| Marital status                          | Married           | Ref                                    | Ref            |
|                                         | Single            | -7.377(-9.599, -5.156)*                | .000           |
|                                         | Divorced          | -9.345(-14.102, -4.588)*               | .000           |
| Seizure frequency during last follow up | No seizure        | Ref                                    | Ref            |
|                                         | 1-2 seizure       | -3.444(-5.907, -.981)*                 | .006           |
|                                         | 3 or more seizure | -7.790(-10.994, -4.586)*               | .000           |
| Number of AED/day                       | Mono therapy      | Ref                                    | Ref            |
|                                         | poly therapy      | -16.625(-19.103, -14.14)*              | .000           |
| Epilepsy duration                       | < 5 years         | Ref                                    | Ref            |
|                                         | 5-10years         | -1.182(-4.099, 1.736)                  | .426           |
|                                         | =>11 years        | -2.952(-5.721, -.184)*                 | .037           |
| Duration on treatment                   | <=5 years         | Ref                                    | Ref            |
|                                         | 6-10 years        | .318(-2.320, 2.956)                    | .813           |
|                                         | >10 years         | -3.369(-6.146, -.592)*                 | .018           |
| Drug adherence                          | Adherent          | Ref                                    | Ref            |
|                                         | Non adherent      | -15.986(-19.173, -12.798)*             | .00            |
| Anxiety comorbidity                     | No                | Ref                                    | Ref            |
|                                         | Yes               | -8.845(-11.942, -5.749)*               | .00            |
| Depression comorbidity                  | No                | Ref                                    | Ref            |
|                                         | Yes               | -11.821(-15.020, -8.623)*              | .00            |
| Other comorbid diagnosed disease        | No                | Ref                                    | Ref            |
|                                         | Yes               | -4.032(-7.083, -.981)*                 | .010           |
|                                         | Improved          | Ref                                    | Ref            |

|                  |                     |                           |      |
|------------------|---------------------|---------------------------|------|
| Current status   | no change           | 4.357(.229, 8.485)        | .039 |
|                  | Deteriorated        | -10.196(-15.392, -5.000)* | .000 |
| Self esteem      | Yes                 | Ref                       | Ref  |
|                  | No                  | -.594(-.896, -.292)*      | .000 |
| Perceived stigma | No                  | Ref                       | Ref  |
|                  | Yes                 | -4.733(-6.946, -2.521)*   | .00  |
| Social support   | Strong              | Ref                       | Ref  |
|                  | Moderate            | -7.831(-10.755, -4.906)*  | .000 |
|                  | poor social support | -10.198(-12.906, -7.490)* | .000 |
| Sleep quality    | Good sleep quality  | Ref                       | Ref  |
|                  | poor sleep quality  | -4.396(-7.304, -1.488)*   | .003 |

261 Notes: \* $p < 0.2$  in simple linear regression

### 262 3.5.2 Associated factors multiple linear regression analysis result

263 The results of multiple linear regression showed that age, marital status, seizure frequency, poly  
264 drug therapy, AED non-adherence, anxiety, and poor social support were found to be statistically  
265 significant at  $p$ -value  $< 0.05$ .

266 A score in quality of life is increased by 5 at the age group 18-24( $\beta = 5$ , 95%CI: 2.301, 7.699)  
267 compared to the age group above 44 years. A score in quality of life decreased by 6.9 in single  
268 individuals compared to married individuals ( $\beta = -6.914$ , 95%CI: -8.867, -4.961).

269 A score in quality of life decreased by 2.3 in every 3 or more seizure attacks during last follow up;  
270 ( $\beta = -2.307$ , 95%CI: -4.795, .020). A score in quality of life decreased by 12.7 in every unit increase  
271 of poly-therapy score ( $\beta = -12.661$ , 95%CI: -15.030, -10.293). Quality of life of epileptic patients  
272 decreased by 4.06 in every unit increase in a score of anxiety symptoms ( $\beta = -4.062$ , 95%CI: -  
273 6.503, -1.621) (See table below).

274 **Table 6: Multiple Linear Regression of Quality of Life of epileptic patients on treatment follow up**  
275 **in North Shoa administration, Amhara national state, Ethiopia, 2021 (N=462)**

| Variables | Categories  | Unstandardized | standardized $\beta$ | 95%CI           |
|-----------|-------------|----------------|----------------------|-----------------|
|           |             | $\beta$        |                      |                 |
|           | 18-24 years | 5.000          | .186                 | (2.301, 7.699)* |

|                                         |                   |         |       |                     |
|-----------------------------------------|-------------------|---------|-------|---------------------|
| Age                                     | 25-34 years       | 3.298   | .124  | (.901, 5.695)       |
|                                         | 35-44 years       | .856    | .028  | (-1.697, 3.409)     |
|                                         | >44 years         | Ref     | Ref   | Ref                 |
| Marital status                          | Married           | Ref     | Ref   | Ref                 |
|                                         | Single            | -6.914  | -.277 | (-8.867, -4.961)*   |
|                                         | Divorced          | -2.850  | -.053 | (-6.429, .729)      |
| Seizure frequency during last follow up | No seizure        | Ref     | Ref   | Ref                 |
|                                         | 1-2 seizure       | .298    | .012  | (-1.571, 2.168)     |
|                                         | 3 or more seizure | -2.387  | -.075 | (-4.795, .020)*     |
| Number of AED/day                       | Mono therapy      | Ref     | Ref   | Ref                 |
|                                         | poly therapy      | -12.661 | -.399 | (-15.030, -10.293)* |
| Epilepsy duration                       | < 5 years         | Ref     | Ref   | Ref                 |
|                                         | 5-10years         | .497    | .019  | (-2.120, 3.115)     |
|                                         | =>11 years        | -.988   | -.039 | (-3.883, 1.908)     |
| Duration on treatment                   | <=5 years         | Ref     | Ref   | Ref                 |
|                                         | 6-10 years        | 1.012   | .038  | (-1.397, 3.421)     |
|                                         | >10 years         | -.838   | -.030 | (-3.697, 2.021)     |
| Drug adherence                          | Adherent          | Ref     | Ref   | Ref                 |
|                                         | Non adherent      | -11.016 | -.288 | (-13.642, -8.389)*  |
| Anxiety comorbidity                     | No                | Ref     | Ref   | Ref                 |
|                                         | Yes               | -4.062  | -.116 | (-6.503, -1.621)*   |
| Depression comorbidity                  | No                | Ref     | Ref   | Ref                 |
|                                         | Yes               | -2.163  | -.059 | (-5.018, .692)      |
| Other comorbid diagnosed disease        | No                | Ref     | Ref   | Ref                 |
|                                         | Yes               | -.633   | -.019 | (-2.854, 1.589)     |
| Current status                          | Improved          | Ref     | Ref   | Ref                 |
|                                         | no change         | -.309   | -.007 | (-3.305, 2.687)     |
|                                         | Deteriorated      | -.222   | -.004 | (-4.248, 3.803)     |
| Self esteem                             | Yes               | Ref     | Ref   | Ref                 |
|                                         | No                | .195    | .058  | (-.049, .440)       |
| Perceived stigma                        | No                | Ref     | Ref   | Ref                 |

|                |                     |        |       |                  |
|----------------|---------------------|--------|-------|------------------|
|                | Yes                 | -1.114 | -.045 | (-2.802, .575)   |
| Social support | Strong              | Ref    | Ref   | Ref              |
|                | Moderate            | -5.580 | -.209 | -7.792, -3.368)* |
|                | poor social support | -6.220 | -.252 | -8.422, -4.017)* |
| Sleep quality  | Good sleep quality  | Ref    | Ref   | Ref              |
|                | poor sleep quality  | -.214  | -.007 | (-2.371, 1.943)  |

276 Notes: \* $p < 0.05$  in multiple linear regression and statically significant

#### 277 4. Discussion

278 This study tried to assess quality of life and associated factors among patients with epilepsy.  
 279 According to this study finding, the mean quality of life score among participants was 57.2  
 280 ( $\pm$ SD=12.3). This result was in line with 61.49 mean score of Indian (24), 58 mean score of  
 281 Ugandan(6), 60.47 mean score of Wollega zone (10), 58 mean score of South Wollo and 60.14  
 282 mean score of Amanuel mental specialized hospital (16) studies.

283 In this study, the mean quality of life score in epileptic patients is higher, compared to a study  
 284 conducted in Kenya (mean score of 49.90), and Bhutan (mean score of 48.9) (25, 26). This  
 285 difference could be due to sample size, clinical characteristics of the participants, cultural  
 286 differences, or the study setting. When compared to the Kenyan and Bhutanese samples, this study  
 287 had a larger sample size.

288 In the Kenyan study, the participants use of poly AED therapy was large (54%) compared with  
 289 this study (16.2%). Different literature (27, 28) has shown poly therapy receiving patients had  
 290 lower mean quality of life. More than half (69%) of study participants in Poland had medical  
 291 comorbidity compared with 16% in this study. This high comorbidity of medical illness might  
 292 contribute to low mean quality of life.

293 This result, however, was lower than the average score of other countries like 74.9 in India, 70.64  
 294 in Serbia, 68.9 in Malaysia, 82 in Canada, and 66.0 in the UK (41, 22, 24, 41-42). The availability  
 295 of standard medical care, sociocultural beliefs, and the patient's lifestyle, as contrasted to this  
 296 study, could be the explanation for this improved quality of life.



297 About domains of quality of life, the environmental domain had low quality of life (mean score of  
298 57.78). This result was supported by Indian and Addis Ababa studies, where the environmental  
299 domain of patients with epilepsy was mostly affected (42, 26).

300 In contrast, results from Ghana showed that the social domain score was the lowest mean score  
301 (29). The disparity might be attributed to differences in belief, culture, and lifestyle variables, all  
302 of which have an impact on quality of life measurements. Because quality of life is a subjective  
303 notion, people from various cultures may interpret it differently.

304 When compared to those who were married, the study found that being single was connected with  
305 a lower quality of life. This result was supported by other studies in India and Wollega zone (24,  
306 30) in Ethiopia. One probable reason for this outcome is that single people will take on more  
307 responsibility for their everyday lives on their own, resulting in a weaker psychosocial area of life.

308 The study's findings also demonstrated that getting older has a detrimental impact on quality of  
309 life. Studies in India and Australia backed up this conclusion (24, 31). The reason for this could  
310 be because epilepsy in older people results in lower psychosocial functioning when compared to  
311 healthy controls (31). Poly therapy was negatively associated with quality of life; this result was  
312 supported by the study in Nigeria (28). The possible explanation might be related to the side effect  
313 of AED.

314 Seizure frequency was significantly associated with quality of life. This finding was consistent  
315 with other studies (32-36). The most likely explanation is that frequent seizures are linked to  
316 excessive fear, a sense of stigmatization, and a reduction in physical activity. This could lead to a  
317 reduction in physical activity as well as psychological issues.

318 According to this study Patient with comorbid anxiety scored lower on the quality of life scale,  
319 Studies in Thailand, United Kingdom, Wollega zone and Amanuel specialized mental hospital in  
320 Addis Ababa supported this finding (32, 37). Patients with epilepsy who experience frequent  
321 seizures showed increased anxiety symptoms (38) and such a mental health issue is not addressed,  
322 It would have a negative consequence to quality of life of patients.

323 The result of this study showed that AED Non-adherence had negatively associated with quality  
324 of life. This finding was supported by studies in UK (32) and US (31). Patients who were non-  
325 adherent were more likely to have had severe life consequences as a result of their seizures (39).

---

326 The possible explanation might be Non-adherence to an antiepileptic drug (AED) may result in  
327 poor clinical outcomes and increased seizure frequency, resulting in a lower quality of life.

328 Poor social support was associated with a lower quality of life. The experience of being liked and  
329 wanted could have contributed to creating a supportive environment that helped people cope with  
330 their disease. This finding was supported by another study in Switzerland (40)

### 331 **5. Conclusion**

332 The mean quality of life of people living with epilepsy in this study was low. The finding from  
333 this study also indicated that age, marital status, frequent seizure, comorbid anxiety, antiepileptic  
334 drug no adherence, poly therapy, moderate and poor social support were the predictors of quality  
335 of life.

### 336 **6. Recommendations**

#### 337 **To Debre Birhan zonal health department:**

- 338 • Incorporating quality of life assessment tool to patient assessment and treatment plan  
339 formats.
- 340 • Creating agenda on how to improve the quality of life of epileptic patients and reduce  
341 associated factors.
- 342 • Monitoring and evaluation of each health care units how to handle epileptic patients.

#### 343 **To health care professionals**

- 344 • Increase professional counseling on how to cope with psychological, environmental, and  
345 social difficulties.
- 346 • Implementing therapies that focus on early detection of concomitant psychiatric diseases  
347 in patients with epilepsy, such as depression and anxiety.

#### 348 **To Debre Birhan university**

- 349 • Giving training for health care professionals specially focusing on the four domains of  
350 quality of life.

### 351 **Competing interests**

352 The authors declare that they have no competing interests.

### 353 **Funding**

354 This work was funded from self.

### 355 **Authors' contributions**

---

356 EG-performed data collections and analyzed the data. EG, GE, BT, NA & AE wrote the  
357 manuscript. All authors read and approved the final manuscript.

### 358 **Acknowledgements**

359 We would like to acknowledge Debre Birhan University and CBE office for financial and technical  
360 support. We also would like to express our heartfelt thanks to our advisor Mr. **Akine Eshete** (BSc,  
361 MPH and Assistance professor of public health) and **Mr. Nigus Alemnewu** (BSc, MSc) for their  
362 genuine and valuable comment given for us.

### 363 **7. References**

- 364 1. Organization WH. WHOQOL-BREF: introduction, administration, scoring and generic  
365 version of the assessment: field trial version, December 1996. World Health Organization, 1996.
- 366 2. Organization WH. Programme on mental health: WHOQOL user manual. World Health  
367 Organization, 1998.
- 368 3. Group TW. The World Health Organization quality of life assessment (WHOQOL):  
369 development and general psychometric properties. *Social science & medicine*. 1998;46(12):1569-  
370 85.
- 371 4. Fisher RS, Acevedo C, Arzimanoglou A, Bogacz A, Cross JH, Elger CE, et al. ILAE  
372 official report: a practical clinical definition of epilepsy. *Epilepsia*. 2014;55(4):475-82.
- 373 5. Gebre AK, Haylay A. Sociodemographic, clinical variables, and quality of life in patients  
374 with epilepsy in Mekelle City, Northern Ethiopia. *Behavioural Neurology*. 2018;2018.
- 375 6. Nabukenya AM, Matovu JK, Wabwire-Mangen F, Wanyenze RK, Makumbi F. Health-  
376 related quality of life in epilepsy patients receiving anti-epileptic drugs at National Referral  
377 Hospitals in Uganda: a cross-sectional study. *Health and quality of life outcomes*. 2014;12(1):49.
- 378 7. Organization WH. *Epilepsy: a public health imperative*: World Health Organization; 2019.
- 379 8. UCB. UCB. *Epilepsy and Quality of Life: Fact Sheet*. 2008. 2008.
- 380 9. Muche EA, Ayalew MB, Abdela OA. Assessment of Quality of Life of Epileptic Patients  
381 in Ethiopia. *International Journal of Chronic Diseases*. 2020;2020.
- 382 10. Abadiga M, Mosisa G, Amente T, Oluma A. Health-related quality of life and associated  
383 factors among epileptic patients on treatment follow up at public hospitals of Wollega zones,  
384 Ethiopia, 2018. *BMC research notes*. 2019;12(1):679.

- 385 11. Stotaw AS, Beyene DA, Hasen SL, Ali YS. Health Related Quality of Life and Associated  
386 Factors among Epileptic Patients at Dessie Referral Hospital, Amhara Regional State, North East  
387 Ethiopia, 2020, A Cross Sectional Study.. 2020.
- 388 12. Tefera GM, Megersa WA, Gadisa DA. Health-related quality of life and its determinants  
389 among ambulatory patients with epilepsy at Ambo General Hospital, Ethiopia: Using WHOQOL-  
390 BREF. *PloS one*. 2020;15(1):e0227858.
- 391 13. Tegegne MT, Muluneh NY, Wochamo TT, Awoke AA, Mossie TB, Yesigat MA.  
392 Assessment of quality of life and associated factors among people with epilepsy attending at  
393 Amanuel Mental Specialized Hospital, Addis Ababa, Ethiopia. *Science Journal of Public Health*.  
394 2014;2(5):378-83.
- 395 14. Alsaadi T, Kassie S, El Hammasi K, Shahrour TM, Shakra M, Turkawi L, et al. Potential  
396 factors impacting health-related quality of life among patients with epilepsy: results from the  
397 United Arab Emirates. *Seizure*. 2017;53:13-7.
- 398 15. Adugna A. *Demography and Health 2018* [cited 2018 december 16].
- 399 16. Mesafint G, Shumet S, Habtamu Y, Fanta T, Molla G. Quality of Life and Associated  
400 Factors Among Patients with Epilepsy Attending Outpatient Department of Saint Amanuel Mental  
401 Specialized Hospital, Addis Ababa, Ethiopia, 2019. *Journal of Multidisciplinary Healthcare*.  
402 2020;13:2021.
- 403 17. Thompson K, Kulkarni J, Sergejew A. Reliability and validity of a new Medication  
404 Adherence Rating Scale (MARS) for the psychoses. *Schizophrenia research*. 2000;42(3):241-7.
- 405 18. HADS). Hospital Anxiety and Depression Scale (HADS) [cited 2020 December 16/2020].
- 406 19. Rosenberg M. Rosenberg self-esteem scale (RSE). Acceptance and commitment therapy  
407 Measures package. 1965;61(52):18.
- 408 20. Taylor J, Baker GA, Jacoby A. Levels of epilepsy stigma in an incident population and  
409 associated factors. *Epilepsy & Behavior*. 2011;21(3):255-60.
- 410 21. Van Lente E, Barry MM, Molcho M, Morgan K, Watson D, Harrington J, et al. Measuring  
411 population mental health and social well-being. *International journal of public health*.  
412 2012;57(2):421-30.
- 413 22. Buysse DJ, Reynolds III CF, Monk TH, Berman SR, Kupfer DJ. The Pittsburgh Sleep  
414 Quality Index: a new instrument for psychiatric practice and research. *Psychiatry research*.  
415 1989;28(2):193-213.
-

- 416 23. Adem K, Kassew T, Birhanu A, Abate A. Sleep Quality and Associated Factors among  
417 Peoples with Epilepsy Who Have a Follow-Up at Amanuel Mental Specialized Hospital, Addis  
418 Ababa, Ethiopia, 2019: An Institutional Based Cross-Sectional Study. *Psychiatry Journal*.  
419 2020;2020.
- 420 24. Rakesh P, Ramesh R, Rachel P, Chanda R, Satish N, Mohan V. Quality of life among  
421 people with epilepsy: a cross-sectional study from rural southern India. *Natl Med J India*.  
422 2012;25(25):261-4.
- 423 25. Kinyanjui DW, Kathuku DM, Mburu JM. Quality of life among patients living with  
424 epilepsy attending the neurology clinic at Kenyatta National Hospital, Nairobi, Kenya: a  
425 comparative study. *Health and quality of life outcomes*. 2013;11(1):1-9.
- 426 26. Saadi A, Patenaude B, Nirola DK, Deki S, Tshering L, Clark S, et al. Quality of life in  
427 epilepsy in Bhutan. *Seizure*. 2016;39:44-8.
- 428 27. Staniszewska A, Kurkowska-Jastrzębska I, Tarchalska-Kryńska B. Quality of life in  
429 patients with epilepsy. *Journal of Public Health, Nursing and Medical Rescue*.  
430 2015;157(2015\_3):20-6.
- 431 28. Mosaku KS, Fatoye FO, Komolafe M, Lawal M, Ola BA. Quality of life and associated  
432 factors among adults with epilepsy in Nigeria. *The International Journal of Psychiatry in Medicine*.  
433 2006;36(4):469-81.
- 434 29. Ankrah D. *Pharmaceutical policies and access to medicines: a hospital-pharmacy  
435 perspective from Ghana*: Utrecht University; 2017.
- 436 30. Abadiga M, Mosisa G, Amente T, Oluma A. Health-related quality of life and associated  
437 factors among epileptic patients on treatment follow up at public hospitals of Wollega zones,  
438 Ethiopia, 2018. *BMC research notes*. 2019;12(1):1-7.
- 439 31. McLaughlin DP, Pachana NA, Mcfarland K. Stigma, seizure frequency and quality of life:  
440 the impact of epilepsy in late adulthood. *Seizure*. 2008;17(3):281-7.
- 441 32. Ridsdale L, Wojewodka G, Robinson E, Landau S, Noble A, Taylor S, et al. Characteristics  
442 associated with quality of life among people with drug-resistant epilepsy. *Journal of neurology*.  
443 2017;264(6):1174-84.
- 444 33. Norsa'adah B, Zainab J, Knight A. The quality of life of people with epilepsy at a tertiary  
445 referral centre in Malaysia. *Health and quality of life outcomes*. 2013;11(1):1-6.
-

- 446 34. Anu M, Suresh K, Basavanna P. A cross-sectional study of quality of life among subjects  
447 with epilepsy attending a tertiary care hospital. *Journal of clinical and diagnostic research: JCDR*.  
448 2016;10(12):OC13.
- 449 35. Velez FF, Bond TC, Anastassopoulos KP, Wang X, Sousa R, Blum D, et al. Impact of  
450 seizure frequency reduction on health-related quality of life among clinical trial subjects with  
451 refractory partial-onset seizures: a pooled analysis of phase III clinical trials of eslicarbazepine  
452 acetate. *Epilepsy & Behavior*. 2017;68:203-7.
- 453 36. Piperidou C, Karlovasitou A, Triantafyllou N, Dimitrakoudi E, Terzoudi A, Mavraki E, et  
454 al. Association of demographic, clinical and treatment variables with quality of life of patients  
455 with epilepsy in Greece. *Quality of Life Research*. 2008;17(7):987-96.
- 456 37. Phabphal K, Geater A, Limapichart K, Satirapunya P, Setthawatcharawanich S. Quality of  
457 life in epileptic patients in southern Thailand. *Medical journal of the Medical Association of*  
458 *Thailand*. 2009;92(6):762.
- 459 38. Beyenburg S, Mitchell AJ, Schmidt D, Elger CE, Reuber M. Anxiety in patients with  
460 epilepsy: systematic review and suggestions for clinical management. *Epilepsy & Behavior*.  
461 2005;7(2):161-71.
- 462 39. Hovinga CA, Asato MR, Manjunath R, Wheless JW, Phelps SJ, Sheth RD, et al.  
463 Association of non-adherence to antiepileptic drugs and seizures, quality of life, and productivity:  
464 survey of patients with epilepsy and physicians. *Epilepsy & Behavior*. 2008;13(2):316-22.
- 465 40. Mahrer-Imhof R, Jaggi S, Bonomo A, Hediger H, Eggenschwiler P, Krämer G, et al.  
466 Quality of life in adult patients with epilepsy and their family members. *Seizure*. 2013;22(2):128-  
467
